# Supplementary material for: Cannabinoid Receptor Stimulation Impairs Mitochondrial Biogenesis in Mouse White Adipose Tissue, Muscle, and Liver: The Role of eNOS, p38 MAPK, and AMPK Pathways
Source: PubMed Central journal article supplement — Diabetes. 2010 Aug 25;59(11):2826–36. doi: 10.2337/db09-1881 (PMC2963541; doi:10.2337/db09-1881), 2010-08-25
Supplement: supp_db09-1881_DB091881ONLINEAPPENDIX.pdf [file supp_db09-1881_DB091881ONLINEAPPENDIX.pdf]

## ONLINE APPENDIX

### **Cannabinoid receptor stimulation impairs mitochondrial biogenesis in mouse white adipose tissue, muscle, and liver: the role of eNOS, p38 MAPK, and AMPK pathways**

Laura Tedesco,<sup>1,2</sup> Alessandra Valerio,<sup>1,3</sup> Marta Dossena,<sup>1,3</sup> Annalisa Cardile,<sup>1</sup> Maurizio Ragni,<sup>1</sup> Claudio Pagano,<sup>4</sup> Uberto Pagotto,<sup>5</sup> Michele O. Carruba,<sup>1,2</sup> Roberto Vettor,<sup>4</sup> and Enzo Nisoli<sup>1,2</sup>

<sup>1</sup>Integrated Laboratories Network, Center for Study and Research on Obesity, Department of Pharmacology, Chemotherapy and Medical Toxicology, School of Medicine, University of Milan, Milan, Italy; <sup>2</sup>Istituto Auxologico Italiano, Milan, Italy; <sup>3</sup>Department of Biomedical Sciences and Biotechnologies, University of Brescia, Brescia, Italy; <sup>4</sup>Endocrine-Metabolic Laboratory, Internal Medicine, Department of Medical and Surgical Sciences, University of Padova, Padova, Italy; <sup>5</sup>Endocrinology Unit, Department of Internal Medicine and Gastroenterology, and Center for Applied Biomedical Research S. Orsola-Malpighi Hospital, Alma Mater Bologna University, Bologna, Italy.

## SUPPLEMENTAL DATA

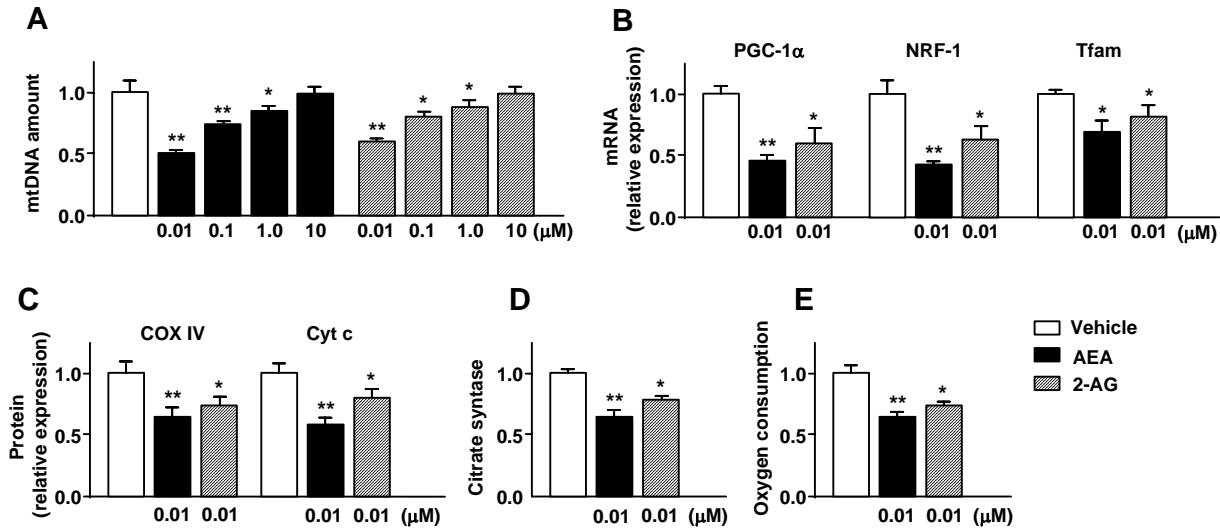

**Figure S1.**

The endocannabinoids anandamide (AEA) and 2-arachidonoylglycerol (2-AG) decrease mitochondrial biogenesis in cultured mouse white adipocytes. *A*: mtDNA amount, analyzed by means of quantitative PCR in white adipocytes treated either with vehicle (0.002% DMSO) or different doses of endocannabinoids for 2 days. Values of the vehicle-treated cells were taken as 1.0 ( $n = 3$  experiments). *B*: PGC-1 $\alpha$ , NRF-1, and Tfam mRNA levels were analyzed by means of quantitative RT-PCR. The cycle number at which the various transcripts were detectable was compared to that of  $\beta$ -actin, and expressed as relative expression versus values in vehicle-treated cells taken as 1.0 ( $n = 3$  experiments). *C*: COX IV and Cyt c protein levels detected by immunoblot with densitometric analysis referred to  $\beta$ -actin, with values from vehicle-treated cells taken as 1.0 ( $n = 3$  experiments). *D*: Citrate synthase activity (nmol citrate/min/mg protein) and *E*: oxygen consumption (nmol O<sub>2</sub>/min/mg protein) were expressed as fold-change vs. vehicle-treated cells taken as 1.0 ( $n = 3$  experiments). *A-E*: \* $P < 0.05$  and \*\* $P < 0.01$  vs. vehicle-treated cells. All data represent mean  $\pm$  SEM.

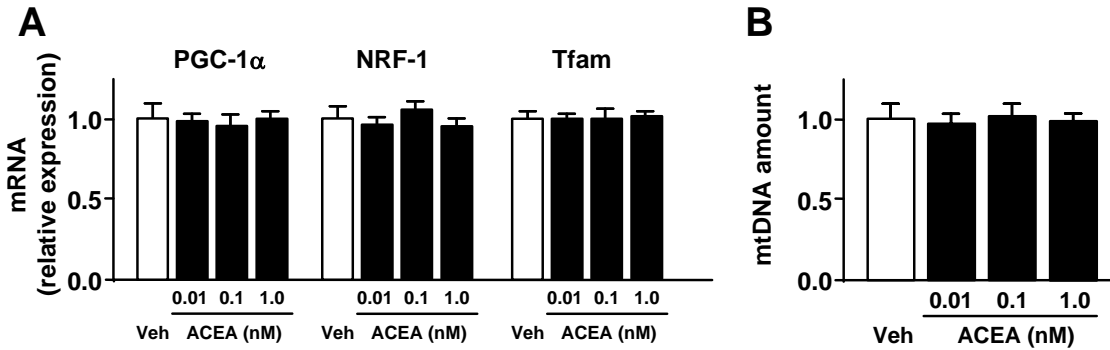

**Figure S2.**

Low concentrations of ACEA do not affect mitochondrial biogenesis in mouse white adipocytes. *A*: PGC-1 $\alpha$ , NRF-1, and Tfam mRNA levels were analyzed by means of quantitative RT-PCR white adipocytes treated either with vehicle (0.002% DMSO, Veh) or ACEA for 2 days. The cycle number at which the various transcripts were detectable was compared to that of  $\beta$ -actin, and expressed as relative expression versus values in vehicle-treated cells taken as 1.0 ( $n = 5$  experiments). *B*: mtDNA amount, analyzed by means of quantitative PCR and expressed as mtDNA copy number per nuclear DNA copy number. All data represent mean  $\pm$  SEM.

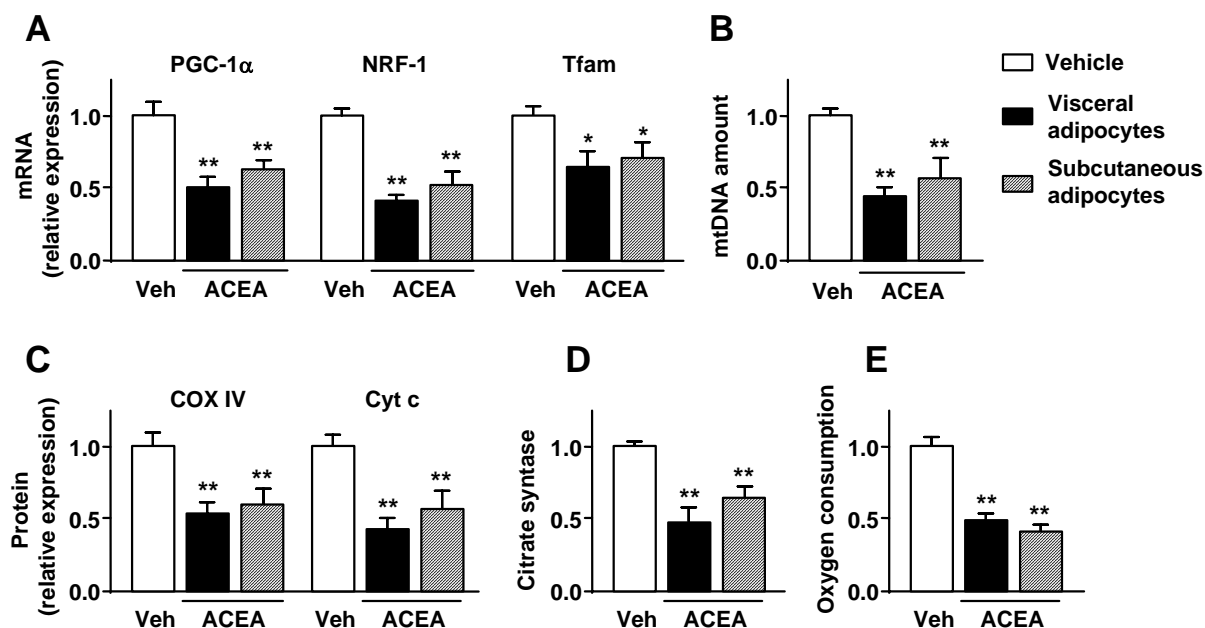

**Figure S3.**

The CB1 receptor agonist ACEA decreases mitochondrial biogenesis in human white adipocytes. **A:** PGC-1 $\alpha$ , NRF-1, and Tfam mRNA levels were analyzed by means of quantitative RT-PCR in visceral and subcutaneous white adipocytes treated either with vehicle (0.002% DMSO, Veh) or 0.01  $\mu$ M ACEA for 2 days. The cycle number at which the various transcripts were detectable was compared to that of  $\beta$ -actin, and expressed as relative expression versus values in vehicle-treated cells taken as 1.0 ( $n = 5$  experiments). \* $P < 0.05$  and \*\* $P < 0.01$  vs. vehicle-treated cells. **B:** mtDNA amount, analyzed by means of quantitative PCR and expressed as mtDNA copy number per nuclear DNA copy number. \*\* $P < 0.01$  vs. vehicle-treated cells. **C:** COX IV and Cyt c proteins were detected by immunoblot analysis. The relative values from the densitometric analysis are referred to  $\beta$ -actin levels; vehicle-treated cell measurement is given a value of 1.0. \*\* $P < 0.01$  vs. vehicle-treated cells. **D:** Citrate synthase activity (nmol citrate/min/mg protein) and **E:** oxygen consumption (nmol O<sub>2</sub>/min/mg protein) were expressed as fold-change vs. vehicle-treated cells taken as 1.0 ( $n = 3$  experiments). \*\* $P < 0.01$  vs. vehicle-treated cells. All data represent mean  $\pm$  SEM.

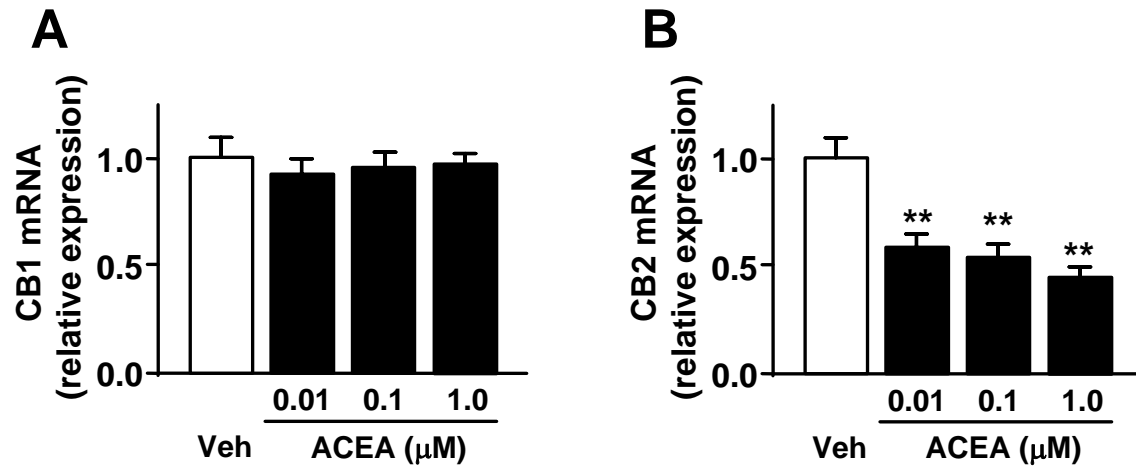

**Figure S4.**

CB1 and CB2 receptor expression in mouse white adipocytes. CB1 and CB2 receptor mRNA levels were analyzed by means of quantitative RT-PCR in white adipocytes treated either with vehicle (0.002% DMSO, Veh) or different doses of ACEA for 2 days. The cycle number at which the various transcripts were detectable was compared to that of  $\beta$ -actin, and expressed as relative expression versus values in vehicle-treated cells taken as 1.0 ( $n = 5$  experiments). \*\*  $P < 0.01$  vs. vehicle-treated cells. All data represent mean  $\pm$  SEM.

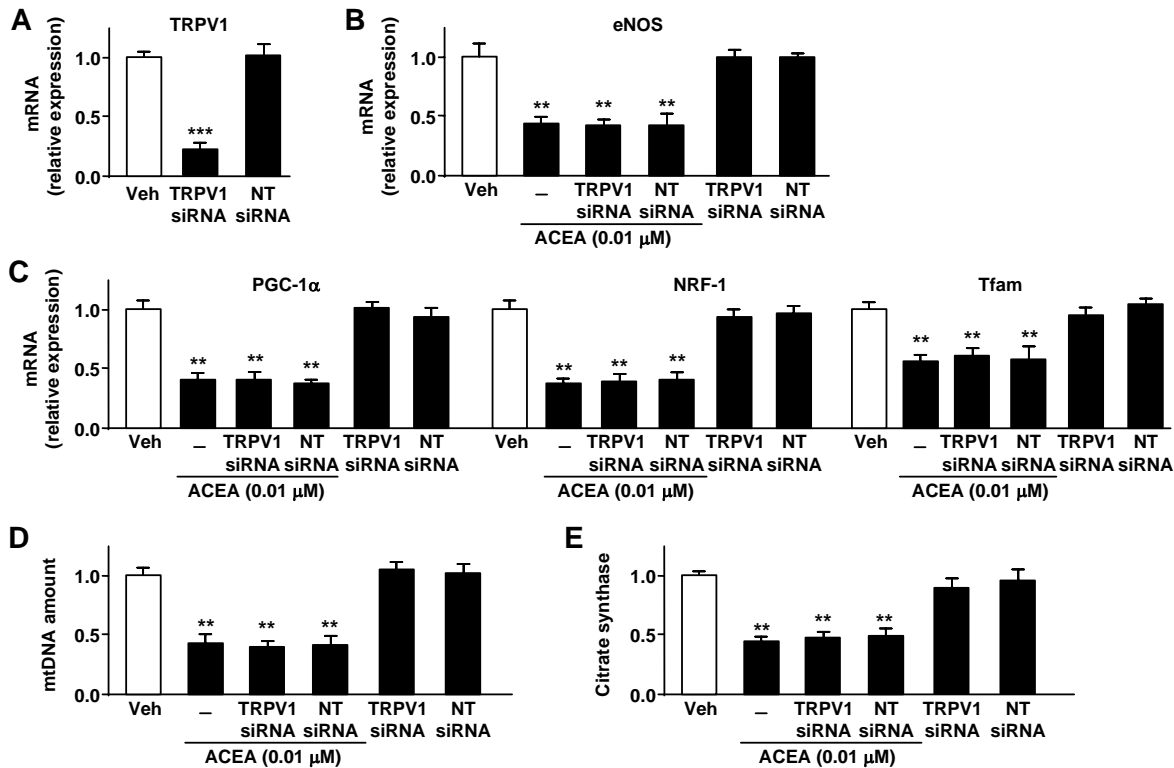

**Figure S5.**

TRPV1 activation is not involved in ACEA-mediated decrease of mitochondrial biogenesis in cultured mouse white adipocytes. *A*: TRPV1 expression in white adipocytes transfected with either TRPV1 siRNA or non-targeting (NT) siRNA. \*\*\* $P < 0.001$  vs. vehicle-treated cells. *B-E*: mitochondrial biogenesis parameters in white adipocytes transfected with either TRPV1 siRNA or NT-siRNA and treated with vehicle (0.002 % DMSO, Veh) or with ACEA for 2 days. *B*: eNOS expression and *C*: PGC-1 $\alpha$ , NRF-1, and Tfam expression. Relative expression values of the vehicle-treated cells were taken as 1.0 ( $n = 5$  experiments; \*\* $P < 0.01$  vs. vehicle-treated cells). *D*: mtDNA amount and *E*: citrate synthase activity. \*\* $P < 0.01$  vs. vehicle-treated cells. All data represent mean  $\pm$  SEM.

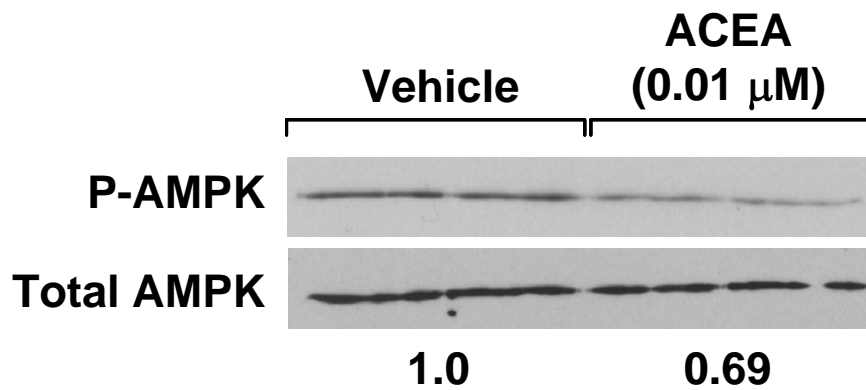

**Figure S6.**

ACEA reduces AMPK phosphorylation in cultured mouse white adipocytes. AMPK phosphorylation in primary white adipocytes exposed to vehicle (0.002% DMSO) or ACEA for 48 h (one experiment representative of three reproducible ones. Relative values from the densitometric analysis (phospho-AMPK/total AMPK) are shown below the blots, with vehicle values taken as 1.0.

## TIBIALIS MUSCLE

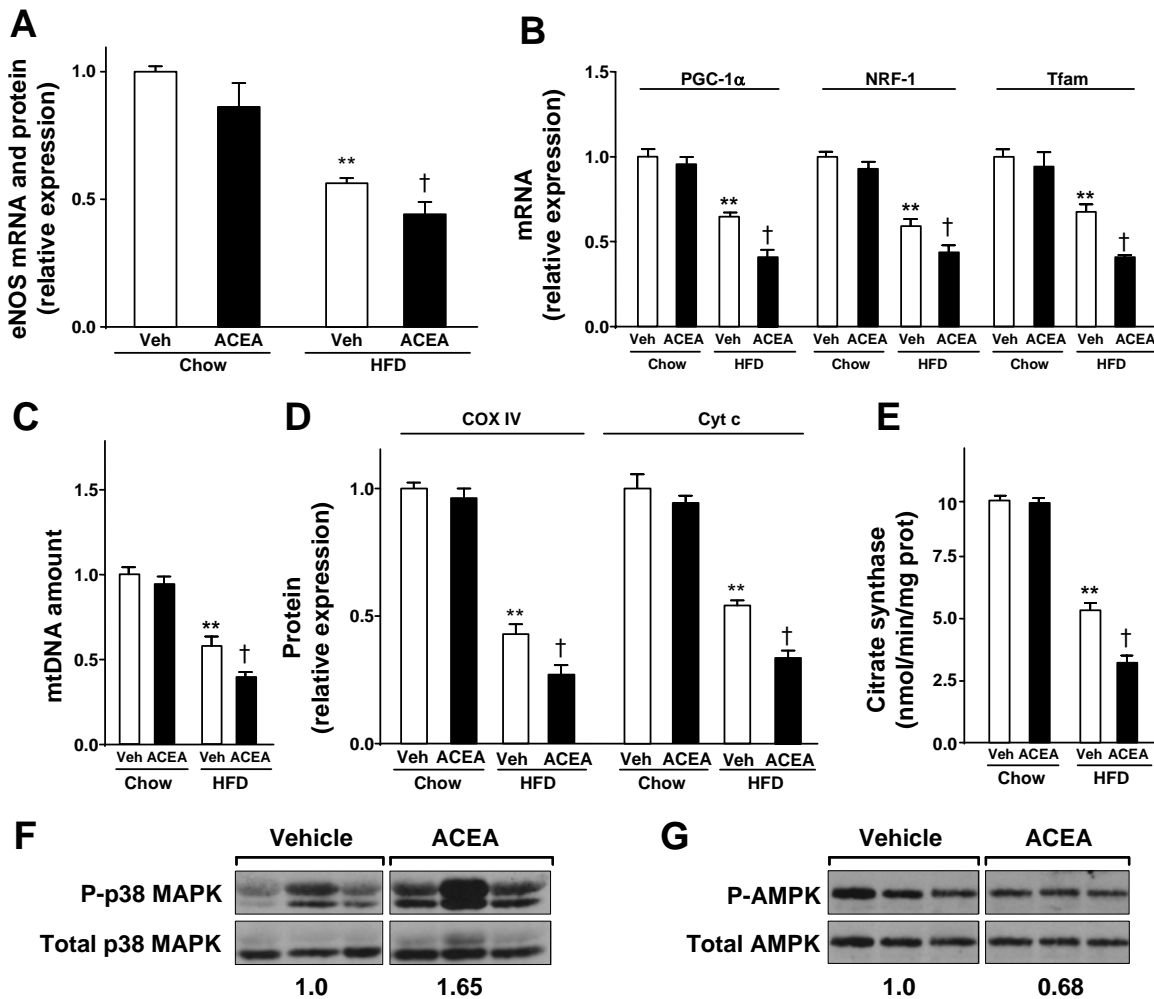

**Figure S7.**

CB1 receptor stimulation down-regulates mitochondrial biogenesis in the tibialis muscle of obese mice. **A:** eNOS mRNA, analyzed by means of quantitative RT-PCR, in tibialis muscle of both ACEA- and vehicle-treated mice on chow regular diet or HFD ( $n = 8$  animals;  $**P < 0.01$  vs. vehicle-treated mice on chow regular diet, and  $^{\dagger}P < 0.05$  vs. vehicle-treated mice on HFD). **B-C:** PGC-1 $\alpha$ , NRF-1, Tfam mRNA levels and mtDNA amount, in muscle of both ACEA- and vehicle-treated mice on chow regular diet or HFD ( $n = 8$  animals;  $**P < 0.01$  vs. vehicle-treated mice on chow regular diet, and  $^{\dagger}P < 0.05$  vs. vehicle-treated mice on HFD). **D:** COX IV and Cyt c protein levels detected by immunoblot with densitometric analysis ( $n = 3$  experiments;  $**P < 0.01$  vs. vehicle-treated mice on chow regular diet and  $^{\dagger}P < 0.05$  vs. vehicle-treated mice on HFD). **E:** Citrate synthase activity ( $n = 3$  experiments;  $**P < 0.01$  vs. vehicle-treated mice on chow regular diet and  $^{\dagger}P < 0.05$  vs. vehicle-treated mice on HFD). **F:** p38 MAPK phosphorylation in muscle of vehicle- and ACEA-treated mice on HFD. **G:** AMPK phosphorylation in muscle of vehicle- and ACEA-treated mice on HFD. All data represent mean  $\pm$  SEM.



## LIVER

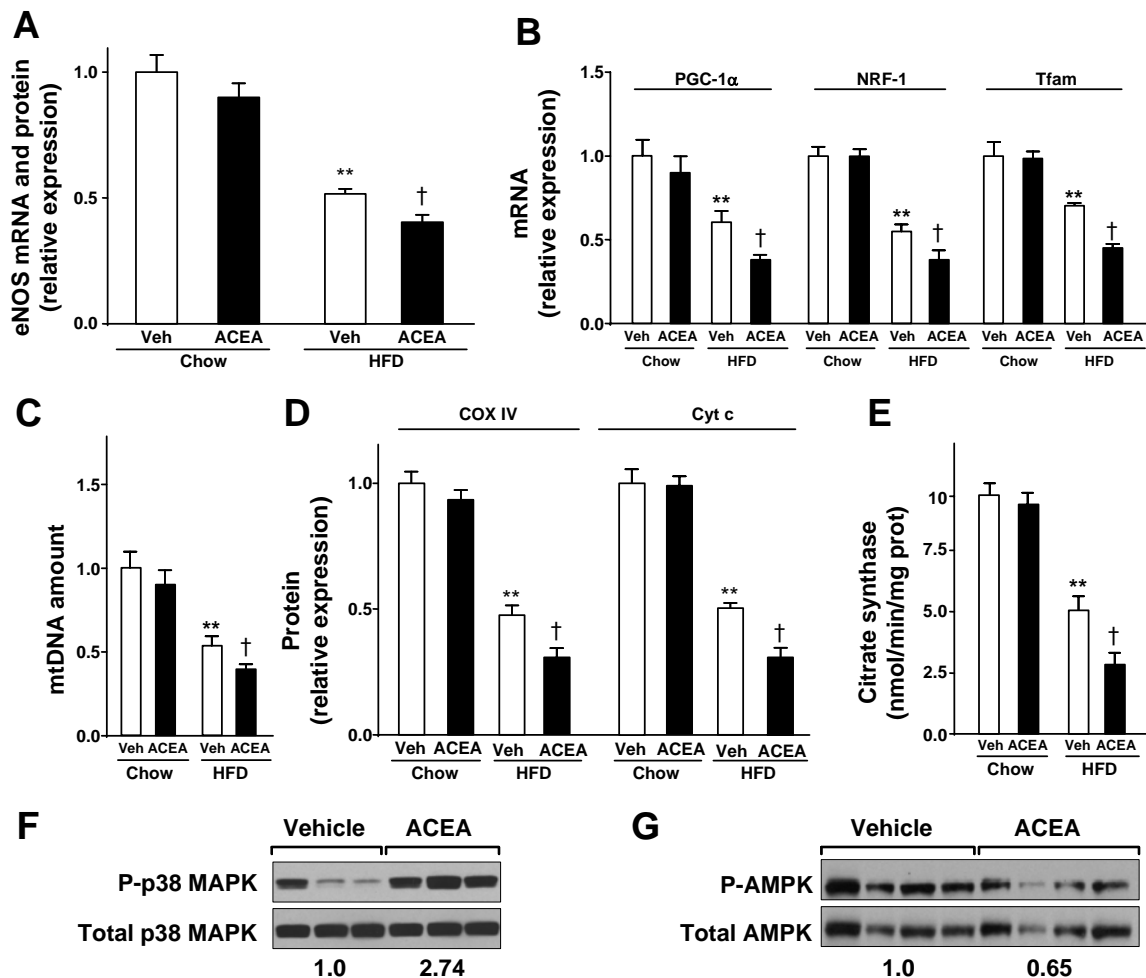

**Figure S8.**

CB1 receptor stimulation down-regulates mitochondrial biogenesis in the liver of obese mice. **A**: eNOS mRNA, analyzed by means of quantitative RT-PCR, in liver of both ACEA- and vehicle-treated mice on chow regular diet or HFD ( $n = 8$  animals;  $**P < 0.01$  vs. vehicle-treated mice on chow regular diet, and  $^{\dagger}P < 0.05$  vs. vehicle-treated mice on HFD). **B-C**: PGC-1 $\alpha$ , NRF-1, Tfam mRNA levels and mtDNA amount, in liver of both ACEA- and vehicle-treated mice on chow regular diet or HFD ( $n = 8$  animals;  $**P < 0.01$  vs. vehicle-treated mice on chow regular diet, and  $^{\dagger}P < 0.05$  vs. vehicle-treated mice on HFD). **D**: COX IV and Cyt c protein levels detected by immunoblot with densitometric analysis ( $n = 3$  experiments;  $**P < 0.01$  vs. vehicle-treated mice on chow regular diet and  $^{\dagger}P < 0.05$  vs. vehicle-treated mice on HFD). **E**: Citrate synthase activity ( $n = 3$  experiments;  $**P < 0.01$  vs. vehicle-treated mice on chow regular diet and  $^{\dagger}P < 0.05$  vs. vehicle-treated mice on HFD). **F**: p38 MAPK phosphorylation in liver of vehicle- and ACEA-treated mice on HFD. **G**: AMPK phosphorylation in liver of vehicle- and ACEA-treated mice on HFD. All data represent mean  $\pm$  SEM.
